# Supplementary material for: Two Mild Phenotype Molybdenum Cofactor Deficiency Patients with Novel MOCS2 Mutation and Immunological Treatment after COVID-19 Infection
Source: Research Square preprint supplement (doi:10.21203/rs.3.rs-7278913/v1), 2025-09-17
Supplement: Supplementary file 3 [file cb4bd8afad432ba6dcd5a8e1.docx]

Figure S1. Sanger sequencing of two missense variants in *MOCS2* in this study.

a-c variant of *MOCS2A* in Pt1’s family, a. sequencing of Pt1, b. sequencing of Pt1’s mother; c. sequencing of Pt1’s father. d-i. Variants of *MOCS2A* in Pt2’s family. d-e, sequencing of Pt2, f-g. sequencing of Pt2’s mother; h-i. sequencing of Pt2’s father.
